# Supplementary material
Source: PubMed Central journal article supplement (PMC8917093)
Supplement: NIHMS1777549-supplement-fS1.pdf [file NIHMS1777549-supplement-fS1.pdf]

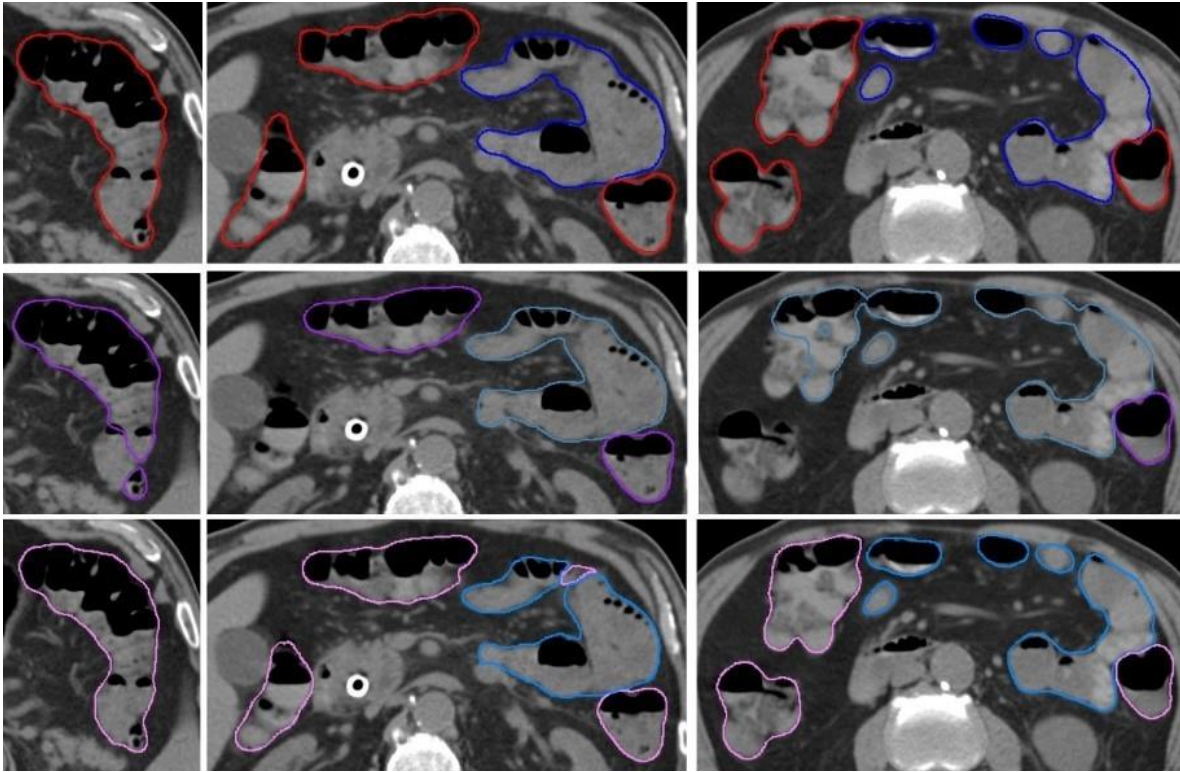

**Figure S-1.** Representative slices of enhanced bowel auto-segmentation accuracy with the use of the pseudo scan extension (PSE) approach in model training, showing the ground truth of the large (red) and small (dark blue) bowels (top), the DL auto-segmentation without PSE for the large (purple) and small (steel blue) bowels (middle), and the DL auto-segmentation with the PSE approach for the large (pink) and small (blue) bowels (bottom).
